# Supplementary material for: Drug Repurposing for Targeting Myeloid-Derived Suppressor-Cell-Generated Immunosuppression in Ovarian Cancer: A Literature Review of Potential Candidates
Source: MDPI journal article supplement (doi:10.3390/pharmaceutics15071792), 2023-06-22
Supplement: s1 [file s1]

# Supplementary Materials: Drug Repurposing for Targeting Myeloid-Derived Suppressor Cell Generated Immunosuppression in Ovarian Cancer: A Literature Review of Potential Candidates

Yani Berckmans, Yannick Hoffert, Ann Vankerckhoven, Erwin Dreesen, An Coosemans

## Supplementary materials S1: final search term pubmed

("Ovarian Neoplasms"[MeSH] OR (ovar\* [tiab] AND (tumor\* OR tumour\* OR cancer\* OR carcinoma\* OR malignan\* OR neoplasm\* [tiab]))) AND (((Myeloid-Derived Suppressor Cells[MeSH Terms] OR myeloid-derived suppressor\*[tiab] OR Granulocyte Precursor Cells[MeSH Terms] OR Granulocyte precursor\*[tiab] OR Monocyte-Macrophage Precursor Cells[MeSH Terms] OR Monocyte-Macrophage Precursor\*[tiab] OR Myeloid Progenitor Cells[MeSH Terms] OR Myeloid Progenitor\*[tiab] OR MDSC\*[tiab] OR myeloid suppressor\*[tiab] OR MSC[tiab] OR MSCs[tiab] OR natural suppressor\*[tiab] OR null cell\*[tiab] OR immature myeloid cell\*[tiab] OR IMC[tiab] OR N2 neutrophil\*[tiab] OR (Myeloid[tiab] AND deriv\*[tiab]) OR (Myeloid[tiab] AND suppress\*[tiab]))) OR ((CD11b[tiab] OR CD11b Antigen[MeSH Terms]) AND (GR1[tiab] OR Ly6G[tiab] OR Ly-6G[tiab] OR Ly6G antigen, mouse[MeSH Terms] OR Ly6C[tiab] OR Ly-6C antigen, mouse[MeSH Terms])) OR ((CD11b[tiab] OR CD11b Antigen[MeSH Terms]) AND (CD33[tiab] OR Sialic Acid Binding Ig-like Lectin 3[MeSH Terms]) AND (CD14[tiab] OR Lipopolysaccharide Receptors[mesh Terms] OR CD15[tiab] OR Lewis X Antigen[MeSH Terms] OR HLA-DR[tiab] OR HLA-DR Antigens[MeSH Terms]))

Resulting in 605 articles on 26/04/2022

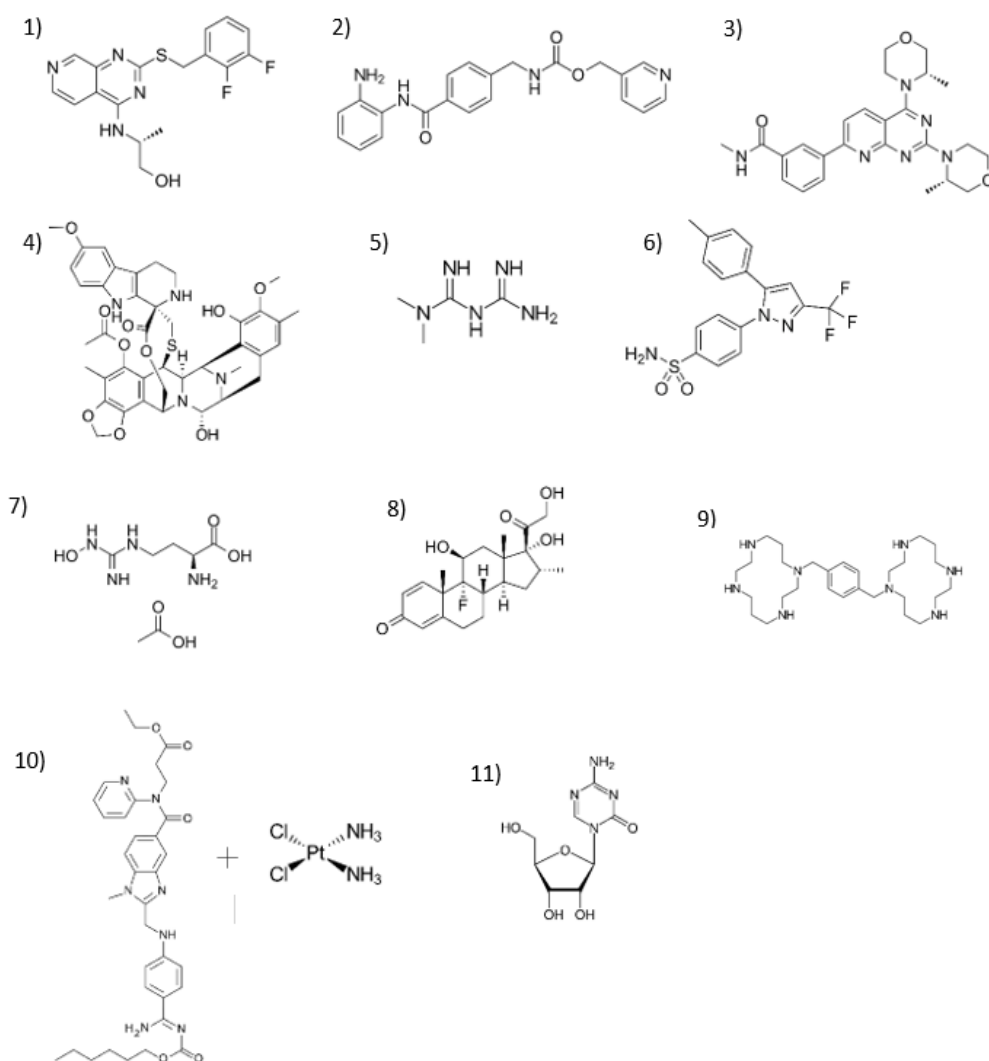

**Figure S1.** Chemical structure of the included compounds. 1) CXCR2 antagonist; 2) entinostat; 3) vistusertib; 4) lurbinectedin; 5) metformin; 6) celecoxib; 7) nor-NOHA; 8) dexamethasone; 9) plerixafor (left) combined with anti-PD-1 (right; general schematic structure); 10) dabigatran (left) and cisplatin (right); 11) 5-azacytidine. Structures of monoclonal antibodies are not included.
